# Supplementary material for: One-Time Acidification of Slurry: What Is the Most Effective Acid and Treatment Strategy?
Source: MDPI journal article supplement (doi:10.3390/agronomy11071319), 2021-06-28
Supplement: s1 [file agronomy-1235973-Supplementary.pdf › agronomy-1235973-Supplementary.pdf]

**Table S1.** The pH value of dairy cow, fattening pig, and sow slurry, and pH value after acidification with lactic or sulfuric acid during storage period of 48 days (means  $\pm$  SD,  $n = 3$ ).

| Day after Acidification                  | 0                             | 3                             | 6                              | 9                             | 13                             | 16                             | 20                             | 27                             | 34                              | 41                             | 48                            |
|------------------------------------------|-------------------------------|-------------------------------|--------------------------------|-------------------------------|--------------------------------|--------------------------------|--------------------------------|--------------------------------|---------------------------------|--------------------------------|-------------------------------|
| <i>Dairy Cow</i><br>No acidification     | 7.06 $\pm$ 0.015 <sup>b</sup> | 7.09 $\pm$ 0.103 <sup>c</sup> | 7.30 $\pm$ 0.069 <sup>d</sup>  | 7.45 $\pm$ 0.090 <sup>c</sup> | 7.85 $\pm$ 0.231 <sup>c</sup>  | 8.10 $\pm$ 0.274 <sup>de</sup> | 8.13 $\pm$ 0.085 <sup>c</sup>  | 8.44 $\pm$ 0.150 <sup>cd</sup> | 8.73 $\pm$ 0.096 <sup>de</sup>  | 8.65 $\pm$ 0.326 <sup>bc</sup> | 8.52 $\pm$ 0.307 <sup>b</sup> |
| <i>Dairy Cow</i><br>Lactic acid          | 5.50 $\pm$ 0.015 <sup>a</sup> | 6.08 $\pm$ 0.015 <sup>b</sup> | 6.69 $\pm$ 0.131 <sup>c</sup>  | 7.02 $\pm$ 0.042 <sup>b</sup> | 7.42 $\pm$ 0.089 <sup>bc</sup> | 7.78 $\pm$ 0.006 <sup>cd</sup> | 7.94 $\pm$ 0.148 <sup>c</sup>  | 8.01 $\pm$ 0.278 <sup>bc</sup> | 8.20 $\pm$ 0.362 <sup>bcd</sup> | 8.24 $\pm$ 0.095 <sup>b</sup>  | 8.28 $\pm$ 0.172 <sup>b</sup> |
| <i>Dairy Cow</i><br>Sulfuric acid        | 5.48 $\pm$ 0.056 <sup>a</sup> | 6.31 $\pm$ 0.079 <sup>b</sup> | 6.80 $\pm$ 0.036 <sup>c</sup>  | 6.96 $\pm$ 0.117 <sup>b</sup> | 7.17 $\pm$ 0.119 <sup>b</sup>  | 7.26 $\pm$ 0.137 <sup>bc</sup> | 7.44 $\pm$ 0.078 <sup>b</sup>  | 7.83 $\pm$ 0.240 <sup>b</sup>  | 8.06 $\pm$ 0.051 <sup>bc</sup>  | 8.18 $\pm$ 0.060 <sup>b</sup>  | 8.24 $\pm$ 0.152 <sup>b</sup> |
| <i>Fattening Pig</i><br>No acidification | 7.13 $\pm$ 0.070 <sup>b</sup> | 7.42 $\pm$ 0.190 <sup>d</sup> | 7.62 $\pm$ 0.074 <sup>e</sup>  | 8.12 $\pm$ 0.166 <sup>d</sup> | 8.42 $\pm$ 0.121 <sup>d</sup>  | 8.54 $\pm$ 0.006 <sup>ef</sup> | 8.71 $\pm$ 0.081 <sup>d</sup>  | 8.80 $\pm$ 0.174 <sup>de</sup> | 8.85 $\pm$ 0.215 <sup>e</sup>   | 8.97 $\pm$ 0.015 <sup>c</sup>  | 8.96 $\pm$ 0.101 <sup>b</sup> |
| <i>Fattening Pig</i><br>Lactic acid      | 5.51 $\pm$ 0.010 <sup>a</sup> | 6.20 $\pm$ 0.070 <sup>b</sup> | 6.68 $\pm$ 0.031 <sup>c</sup>  | 7.42 $\pm$ 0.056 <sup>c</sup> | 7.67 $\pm$ 0.098 <sup>c</sup>  | 7.76 $\pm$ 0.194 <sup>cd</sup> | 8.12 $\pm$ 0.055 <sup>c</sup>  | 8.44 $\pm$ 0.132 <sup>cd</sup> | 8.60 $\pm$ 0.211 <sup>cde</sup> | 8.52 $\pm$ 0.463 <sup>bc</sup> | 8.50 $\pm$ 0.417 <sup>b</sup> |
| <i>Fattening Pig</i><br>Sulfuric acid    | 5.51 $\pm$ 0.017 <sup>a</sup> | 5.81 $\pm$ 0.030 <sup>a</sup> | 6.44 $\pm$ 0.021 <sup>b</sup>  | 6.90 $\pm$ 0.050 <sup>b</sup> | 7.38 $\pm$ 0.251 <sup>bc</sup> | 7.55 $\pm$ 0.372 <sup>cd</sup> | 7.78 $\pm$ 0.245 <sup>bc</sup> | 7.66 $\pm$ 0.176 <sup>b</sup>  | 7.87 $\pm$ 0.061 <sup>b</sup>   | 7.99 $\pm$ 0.047 <sup>b</sup>  | 8.27 $\pm$ 0.035 <sup>b</sup> |
| <i>Sow</i><br>No acidification           | 8.18 $\pm$ 0.015 <sup>c</sup> | 8.64 $\pm$ 0.049 <sup>e</sup> | 8.87 $\pm$ 0.023 <sup>f</sup>  | 8.99 $\pm$ 0.023 <sup>e</sup> | 9.10 $\pm$ 0.000 <sup>e</sup>  | 9.06 $\pm$ 0.125 <sup>f</sup>  | 9.08 $\pm$ 0.084 <sup>d</sup>  | 9.14 $\pm$ 0.064 <sup>e</sup>  | 9.12 $\pm$ 0.053 <sup>e</sup>   | 9.00 $\pm$ 0.235 <sup>c</sup>  | 8.56 $\pm$ 0.724 <sup>b</sup> |
| <i>Sow</i><br>Lactic acid                | 5.51 $\pm$ 0.000 <sup>a</sup> | 5.80 $\pm$ 0.078 <sup>a</sup> | 6.21 $\pm$ 0.084 <sup>a</sup>  | 6.27 $\pm$ 0.012 <sup>a</sup> | 6.41 $\pm$ 0.262 <sup>a</sup>  | 6.88 $\pm$ 0.397 <sup>ab</sup> | 7.38 $\pm$ 0.281 <sup>b</sup>  | 7.59 $\pm$ 0.285 <sup>b</sup>  | 8.10 $\pm$ 0.348 <sup>bc</sup>  | 8.50 $\pm$ 0.190 <sup>bc</sup> | 8.61 $\pm$ 0.081 <sup>b</sup> |
| <i>Sow</i><br>Sulfuric acid              | 5.52 $\pm$ 0.017 <sup>a</sup> | 6.12 $\pm$ 0.090 <sup>b</sup> | 6.36 $\pm$ 0.116 <sup>ab</sup> | 6.50 $\pm$ 0.152 <sup>a</sup> | 6.58 $\pm$ 0.143 <sup>a</sup>  | 6.51 $\pm$ 0.085 <sup>a</sup>  | 6.43 $\pm$ 0.115 <sup>a</sup>  | 6.56 $\pm$ 0.051 <sup>a</sup>  | 6.57 $\pm$ 0.245 <sup>a</sup>   | 6.72 $\pm$ 0.314 <sup>a</sup>  | 6.79 $\pm$ 0.457 <sup>a</sup> |

a,b,c,d,e,f different letters indicate significant differences among the variants within the day after acidification.

**Table S2.** The pH value of dairy cow slurry after acidification with different organic or mineral acids during storage period of 48 days (means  $\pm$  SD,  $n = 3$ ).

| Day after Acidification | 0                             | 3                              | 6                             | 9                               | 13                             | 16                            | 20                             | 27                             | 34                            | 41                            | 48                            |
|-------------------------|-------------------------------|--------------------------------|-------------------------------|---------------------------------|--------------------------------|-------------------------------|--------------------------------|--------------------------------|-------------------------------|-------------------------------|-------------------------------|
| Lactic acid             | 5.50 $\pm$ 0.015 <sup>a</sup> | 6.08 $\pm$ 0.015 <sup>ab</sup> | 6.69 $\pm$ 0.131 <sup>a</sup> | 7.02 $\pm$ 0.042 <sup>b</sup>   | 7.42 $\pm$ 0.089 <sup>bc</sup> | 7.78 $\pm$ 0.006 <sup>b</sup> | 7.94 $\pm$ 0.148 <sup>ab</sup> | 8.01 $\pm$ 0.278 <sup>ab</sup> | 8.20 $\pm$ 0.362 <sup>a</sup> | 8.24 $\pm$ 0.095 <sup>a</sup> | 8.28 $\pm$ 0.172 <sup>a</sup> |
| Acetic acid             | 5.51 $\pm$ 0.012 <sup>a</sup> | 5.97 $\pm$ 0.076 <sup>a</sup>  | 7.15 $\pm$ 0.528 <sup>a</sup> | 7.32 $\pm$ 0.168 <sup>abc</sup> | 7.73 $\pm$ 0.231 <sup>cd</sup> | 8.04 $\pm$ 0.089 <sup>c</sup> | 8.21 $\pm$ 0.180 <sup>b</sup>  | 8.16 $\pm$ 0.244 <sup>ab</sup> | 8.07 $\pm$ 0.172 <sup>a</sup> | 8.37 $\pm$ 0.282 <sup>a</sup> | 8.21 $\pm$ 0.051 <sup>a</sup> |
| Citric acid             | 5.50 $\pm$ 0.017 <sup>a</sup> | 6.36 $\pm$ 0.055 <sup>d</sup>  | 7.00 $\pm$ 0.100 <sup>a</sup> | 7.46 $\pm$ 0.051 <sup>c</sup>   | 7.82 $\pm$ 0.145 <sup>d</sup>  | 8.10 $\pm$ 0.072 <sup>c</sup> | 8.10 $\pm$ 0.471 <sup>ab</sup> | 8.31 $\pm$ 0.146 <sup>b</sup>  | 8.35 $\pm$ 0.246 <sup>a</sup> | 8.41 $\pm$ 0.170 <sup>a</sup> | 8.25 $\pm$ 0.286 <sup>a</sup> |
| Sulfuric acid           | 5.48 $\pm$ 0.056 <sup>a</sup> | 6.31 $\pm$ 0.079 <sup>cd</sup> | 6.80 $\pm$ 0.036 <sup>a</sup> | 6.96 $\pm$ 0.117 <sup>ab</sup>  | 7.17 $\pm$ 0.119 <sup>ab</sup> | 7.26 $\pm$ 0.137 <sup>a</sup> | 7.44 $\pm$ 0.078 <sup>a</sup>  | 7.83 $\pm$ 0.240 <sup>ab</sup> | 8.06 $\pm$ 0.051 <sup>a</sup> | 8.18 $\pm$ 0.060 <sup>a</sup> | 8.24 $\pm$ 0.152 <sup>a</sup> |
| Hydrochloric acid       | 5.52 $\pm$ 0.006 <sup>a</sup> | 6.19 $\pm$ 0.040 <sup>bc</sup> | 6.67 $\pm$ 0.040 <sup>a</sup> | 6.80 $\pm$ 0.015 <sup>a</sup>   | 6.94 $\pm$ 0.066 <sup>a</sup>  | 7.16 $\pm$ 0.049 <sup>a</sup> | 7.33 $\pm$ 0.035 <sup>a</sup>  | 7.68 $\pm$ 0.060 <sup>a</sup>  | 7.97 $\pm$ 0.091 <sup>a</sup> | 8.21 $\pm$ 0.066 <sup>a</sup> | 8.28 $\pm$ 0.075 <sup>a</sup> |

<sup>a,b,c,d</sup> different letters indicate significant differences among the variants within the day after acidification.

**Table S3.** The pH value of dairy cow slurry after acidification with sulfuric or lactic acid under aerobic or anaerobic storing conditions during storage period of 48 days (means  $\pm$  SD,  $n = 3$ ).

| Day after Acidification           | 0                             | 3                             | 6                             | 9                             | 13                            | 16                            | 20                            | 27                            | 34                            | 41                            | 48                            |
|-----------------------------------|-------------------------------|-------------------------------|-------------------------------|-------------------------------|-------------------------------|-------------------------------|-------------------------------|-------------------------------|-------------------------------|-------------------------------|-------------------------------|
| <i>Aerobic</i><br>Lactic acid     | 5.50 $\pm$ 0.015 <sup>a</sup> | 6.08 $\pm$ 0.015 <sup>b</sup> | 6.69 $\pm$ 0.131 <sup>b</sup> | 7.02 $\pm$ 0.042 <sup>c</sup> | 7.42 $\pm$ 0.089 <sup>c</sup> | 7.78 $\pm$ 0.006 <sup>d</sup> | 7.94 $\pm$ 0.148 <sup>d</sup> | 8.01 $\pm$ 0.278 <sup>b</sup> | 8.20 $\pm$ 0.362 <sup>b</sup> | 8.24 $\pm$ 0.095 <sup>b</sup> | 8.28 $\pm$ 0.172 <sup>b</sup> |
| <i>Anaerobic</i><br>Lactic acid   | 5.50 $\pm$ 0.006 <sup>a</sup> | 5.70 $\pm$ 0.029 <sup>a</sup> | 6.53 $\pm$ 0.133 <sup>b</sup> | 6.59 $\pm$ 0.150 <sup>b</sup> | 6.73 $\pm$ 0.140 <sup>b</sup> | 6.67 $\pm$ 0.064 <sup>b</sup> | 6.50 $\pm$ 0.083 <sup>b</sup> | 6.36 $\pm$ 0.137 <sup>a</sup> | 6.38 $\pm$ 0.087 <sup>a</sup> | 6.32 $\pm$ 0.100 <sup>a</sup> | 6.31 $\pm$ 0.100 <sup>a</sup> |
| <i>Aerobic</i><br>Sulfuric acid   | 5.48 $\pm$ 0.056 <sup>a</sup> | 6.31 $\pm$ 0.079 <sup>c</sup> | 6.80 $\pm$ 0.036 <sup>b</sup> | 6.96 $\pm$ 0.117 <sup>c</sup> | 7.17 $\pm$ 0.119 <sup>c</sup> | 7.26 $\pm$ 0.137 <sup>c</sup> | 7.44 $\pm$ 0.078 <sup>c</sup> | 7.83 $\pm$ 0.240 <sup>b</sup> | 8.06 $\pm$ 0.051 <sup>b</sup> | 8.18 $\pm$ 0.060 <sup>b</sup> | 8.24 $\pm$ 0.152 <sup>b</sup> |
| <i>Anaerobic</i><br>Sulfuric acid | 5.49 $\pm$ 0.020 <sup>a</sup> | 5.83 $\pm$ 0.079 <sup>a</sup> | 5.96 $\pm$ 0.108 <sup>a</sup> | 6.02 $\pm$ 0.117 <sup>a</sup> | 6.04 $\pm$ 0.093 <sup>a</sup> | 6.08 $\pm$ 0.096 <sup>a</sup> | 6.13 $\pm$ 0.089 <sup>a</sup> | 6.18 $\pm$ 0.035 <sup>a</sup> | 6.29 $\pm$ 0.105 <sup>a</sup> | 6.27 $\pm$ 0.136 <sup>a</sup> | 6.32 $\pm$ 0.171 <sup>a</sup> |

<sup>a,b,c,d</sup> different letters indicate significant differences among the variants within the day after acidification.

**Table S4.** The pH value of dairy cow, fattening pig, and sow slurry after acidification with sulfuric acid or in combination with glucose addition (0.01 mol glucose kg<sup>-1</sup> slurry) during storage period of 48 days (means  $\pm$  SD,  $n = 3$ ).

| Day after Acidification                              | 0                             | 3                              | 6                             | 9                              | 13                            | 16                              | 20                             | 27                            | 34                             | 41                            | 48                            |
|------------------------------------------------------|-------------------------------|--------------------------------|-------------------------------|--------------------------------|-------------------------------|---------------------------------|--------------------------------|-------------------------------|--------------------------------|-------------------------------|-------------------------------|
| <i>Dairy Cow</i><br>Sulfuric acid                    | 5.48 $\pm$ 0.056 <sup>a</sup> | 6.31 $\pm$ 0.079 <sup>c</sup>  | 6.80 $\pm$ 0.036 <sup>b</sup> | 6.96 $\pm$ 0.117 <sup>b</sup>  | 7.17 $\pm$ 0.119 <sup>b</sup> | 7.26 $\pm$ 0.137 <sup>c</sup>   | 7.44 $\pm$ 0.078 <sup>b</sup>  | 7.83 $\pm$ 0.240 <sup>b</sup> | 8.06 $\pm$ 0.051 <sup>b</sup>  | 8.18 $\pm$ 0.060 <sup>b</sup> | 8.24 $\pm$ 0.152 <sup>b</sup> |
| <i>Dairy Cow</i><br>Sulfuric acid<br>and glucose     | 5.52 $\pm$ 0.017 <sup>a</sup> | 6.12 $\pm$ 0.155 <sup>bc</sup> | 6.73 $\pm$ 0.117 <sup>b</sup> | 6.94 $\pm$ 0.107 <sup>b</sup>  | 7.17 $\pm$ 0.221 <sup>b</sup> | 7.29 $\pm$ 0.121 <sup>c</sup>   | 7.50 $\pm$ 0.125 <sup>b</sup>  | 7.73 $\pm$ 0.111 <sup>b</sup> | 7.90 $\pm$ 0.102 <sup>b</sup>  | 8.20 $\pm$ 0.006 <sup>b</sup> | 8.24 $\pm$ 0.061 <sup>b</sup> |
| <i>Fattening Pig</i><br>Sulfuric acid                | 5.51 $\pm$ 0.017 <sup>a</sup> | 5.81 $\pm$ 0.030 <sup>a</sup>  | 6.44 $\pm$ 0.021 <sup>a</sup> | 6.90 $\pm$ 0.050 <sup>b</sup>  | 7.38 $\pm$ 0.251 <sup>b</sup> | 7.55 $\pm$ 0.372 <sup>acd</sup> | 7.78 $\pm$ 0.245 <sup>bc</sup> | 7.66 $\pm$ 0.176 <sup>b</sup> | 7.87 $\pm$ 0.061 <sup>b</sup>  | 7.99 $\pm$ 0.047 <sup>b</sup> | 8.27 $\pm$ 0.035 <sup>b</sup> |
| <i>Fattening Pig</i><br>Sulfuric acid<br>and glucose | 5.51 $\pm$ 0.010 <sup>a</sup> | 5.71 $\pm$ 0.036 <sup>a</sup>  | 6.30 $\pm$ 0.047 <sup>a</sup> | 6.76 $\pm$ 0.017 <sup>ab</sup> | 7.27 $\pm$ 0.036 <sup>b</sup> | 7.67 $\pm$ 0.244 <sup>bcd</sup> | 7.89 $\pm$ 0.072 <sup>c</sup>  | 8.02 $\pm$ 0.258 <sup>b</sup> | 8.00 $\pm$ 0.462 <sup>ab</sup> | 8.11 $\pm$ 0.119 <sup>b</sup> | 8.04 $\pm$ 0.215 <sup>b</sup> |
| <i>Sow</i><br>Sulfuric acid                          | 5.52 $\pm$ 0.017 <sup>a</sup> | 6.12 $\pm$ 0.090 <sup>bc</sup> | 6.36 $\pm$ 0.116 <sup>a</sup> | 6.50 $\pm$ 0.152 <sup>a</sup>  | 6.58 $\pm$ 0.143 <sup>a</sup> | 6.51 $\pm$ 0.085 <sup>a</sup>   | 6.43 $\pm$ 0.115 <sup>a</sup>  | 6.56 $\pm$ 0.051 <sup>a</sup> | 6.57 $\pm$ 0.245 <sup>a</sup>  | 6.72 $\pm$ 0.314 <sup>a</sup> | 6.79 $\pm$ 0.457 <sup>a</sup> |
| <i>Sow</i><br>Sulfuric acid<br>and glucose           | 5.52 $\pm$ 0.012 <sup>a</sup> | 5.88 $\pm$ 0.118 <sup>ab</sup> | 6.31 $\pm$ 0.087 <sup>a</sup> | 6.51 $\pm$ 0.068 <sup>a</sup>  | 6.63 $\pm$ 0.045 <sup>a</sup> | 6.61 $\pm$ 0.057 <sup>ab</sup>  | 6.64 $\pm$ 0.130 <sup>a</sup>  | 6.70 $\pm$ 0.117 <sup>a</sup> | 6.77 $\pm$ 0.056 <sup>a</sup>  | 6.81 $\pm$ 0.047 <sup>a</sup> | 6.94 $\pm$ 0.080 <sup>a</sup> |

<sup>a,b,c,d</sup> different letters indicate significant differences among the variants within the day after acidification.

**Table S5.** The pH value of dairy cow and fattening slurry (raw and separated slurry) after acidification with sulfuric acid during storage period of 48 days (means  $\pm$  SD,  $n = 3$ ).

| Day after Acidification           | 0                             | 3                               | 6                             | 9                             | 13                            | 16                             | 20                            | 27                            | 34                            | 41                              | 48                             |
|-----------------------------------|-------------------------------|---------------------------------|-------------------------------|-------------------------------|-------------------------------|--------------------------------|-------------------------------|-------------------------------|-------------------------------|---------------------------------|--------------------------------|
| <i>Dairy cow</i><br>Raw           | 5.48 $\pm$ 0.056 <sup>a</sup> | 6.31 $\pm$ 0.079 <sup>c</sup>   | 6.80 $\pm$ 0.036 <sup>c</sup> | 6.96 $\pm$ 0.117 <sup>a</sup> | 7.17 $\pm$ 0.119 <sup>a</sup> | 7.26 $\pm$ 0.137 <sup>a</sup>  | 7.44 $\pm$ 0.078 <sup>a</sup> | 7.83 $\pm$ 0.240 <sup>a</sup> | 8.06 $\pm$ 0.051 <sup>b</sup> | 8.18 $\pm$ 0.060 <sup>b</sup>   | 8.24 $\pm$ 0.152 <sup>a</sup>  |
| <i>Dairy cow</i><br>Separated     | 5.51 $\pm$ 0.017 <sup>a</sup> | 6.11 $\pm$ 0.433 <sup>abc</sup> | 7.38 $\pm$ 0.168 <sup>c</sup> | 8.02 $\pm$ 0.108 <sup>b</sup> | 8.27 $\pm$ 0.032 <sup>b</sup> | 8.39 $\pm$ 0.036 <sup>b</sup>  | 8.36 $\pm$ 0.144 <sup>b</sup> | 8.56 $\pm$ 0.067 <sup>b</sup> | 8.64 $\pm$ 0.051 <sup>c</sup> | 8.74 $\pm$ 0.017 <sup>c</sup>   | 8.69 $\pm$ 0.053 <sup>b</sup>  |
| <i>Fattening pig</i><br>Raw       | 5.51 $\pm$ 0.017 <sup>a</sup> | 5.81 $\pm$ 0.030 <sup>b</sup>   | 6.44 $\pm$ 0.021 <sup>b</sup> | 6.90 $\pm$ 0.050 <sup>a</sup> | 7.38 $\pm$ 0.251 <sup>a</sup> | 7.55 $\pm$ 0.372 <sup>ab</sup> | 7.78 $\pm$ 0.245 <sup>a</sup> | 7.66 $\pm$ 0.176 <sup>a</sup> | 7.87 $\pm$ 0.061 <sup>a</sup> | 7.99 $\pm$ 0.047 <sup>a</sup>   | 8.27 $\pm$ 0.035 <sup>b</sup>  |
| <i>Fattening pig</i><br>Separated | 5.51 $\pm$ 0.010 <sup>a</sup> | 5.64 $\pm$ 0.032 <sup>a</sup>   | 5.70 $\pm$ 0.052 <sup>a</sup> | 7.59 $\pm$ 0.677 <sup>b</sup> | 8.28 $\pm$ 0.091 <sup>b</sup> | 8.46 $\pm$ 0.021 <sup>b</sup>  | 8.55 $\pm$ 0.055 <sup>b</sup> | 8.51 $\pm$ 0.031 <sup>b</sup> | 8.65 $\pm$ 0.060 <sup>c</sup> | 8.56 $\pm$ 0.179 <sup>abc</sup> | 8.42 $\pm$ 0.183 <sup>ab</sup> |

<sup>a,b,c</sup> different letters indicate significant differences among the variants within the day after acidification.

**Table S6.** The pH value of dairy cow slurry after acidification with sulfuric acid to pH 5.5, 4.5 and 3 during storage period of 48 days (means  $\pm$  SD,  $n = 3$ ).

| Day after Acidification | 0                | 3                | 6                | 9                | 13               | 16               | 20               | 27               | 34               | 41               | 48               |
|-------------------------|------------------|------------------|------------------|------------------|------------------|------------------|------------------|------------------|------------------|------------------|------------------|
| pH 5.5                  | 5.48 $\pm$ 0.056 | 6.31 $\pm$ 0.079 | 6.80 $\pm$ 0.036 | 6.96 $\pm$ 0.117 | 7.17 $\pm$ 0.119 | 7.26 $\pm$ 0.137 | 7.44 $\pm$ 0.078 | 7.83 $\pm$ 0.240 | 8.06 $\pm$ 0.051 | 8.18 $\pm$ 0.060 | 8.24 $\pm$ 0.152 |
| pH 4.5                  | 4.51 $\pm$ 0.015 | 4.89 $\pm$ 0.017 | 4.93 $\pm$ 0.029 | 5.20 $\pm$ 0.089 | 5.93 $\pm$ 0.124 | 6.43 $\pm$ 0.067 | 6.78 $\pm$ 0.076 | 7.01 $\pm$ 0.191 | 6.82 $\pm$ 0.080 | 7.06 $\pm$ 0.044 | 7.34 $\pm$ 0.096 |
| pH 3.0                  | 3.02 $\pm$ 0.015 | 3.34 $\pm$ 0.010 | 3.35 $\pm$ 0.015 | 3.34 $\pm$ 0.020 | 3.34 $\pm$ 0.015 | 3.33 $\pm$ 0.010 | 3.33 $\pm$ 0.012 | 3.34 $\pm$ 0.015 | 3.34 $\pm$ 0.015 | 3.34 $\pm$ 0.015 | 3.36 $\pm$ 0.017 |
